# Supplementary material for: ANKHD1 promotes proliferation and invasion of non-small-cell lung cancer cells via regulating YAP oncoprotein expression and inactivating the Hippo pathway
Source: PubMed Central journal article supplement — Int J Oncol. 2020 Feb 19;56(5):1175–85. doi: 10.3892/ijo.2020.4994 (PMC7115354; doi:10.3892/ijo.2020.4994), 2020-02-19

Figure S1. Immunohistochemical staining of NSCLC and normal lung tissue (magnification, x200; scale bar, 100  $\mu$ m). In the bronchial (A) and alveolar (B) cells of normal tissues, both ANKHD1 and YAP were weakly expressed or negative, while in lung squamous cell cancer (C and D) and adenocarcinoma (E and F) tissues, both ANKHD1 and YAP were strongly expressed. ANKHD1, ankyrin repeat and KH domain-containing 1; NSCLC, non-small-cell lung cancer; YAP, yes-associated protein.

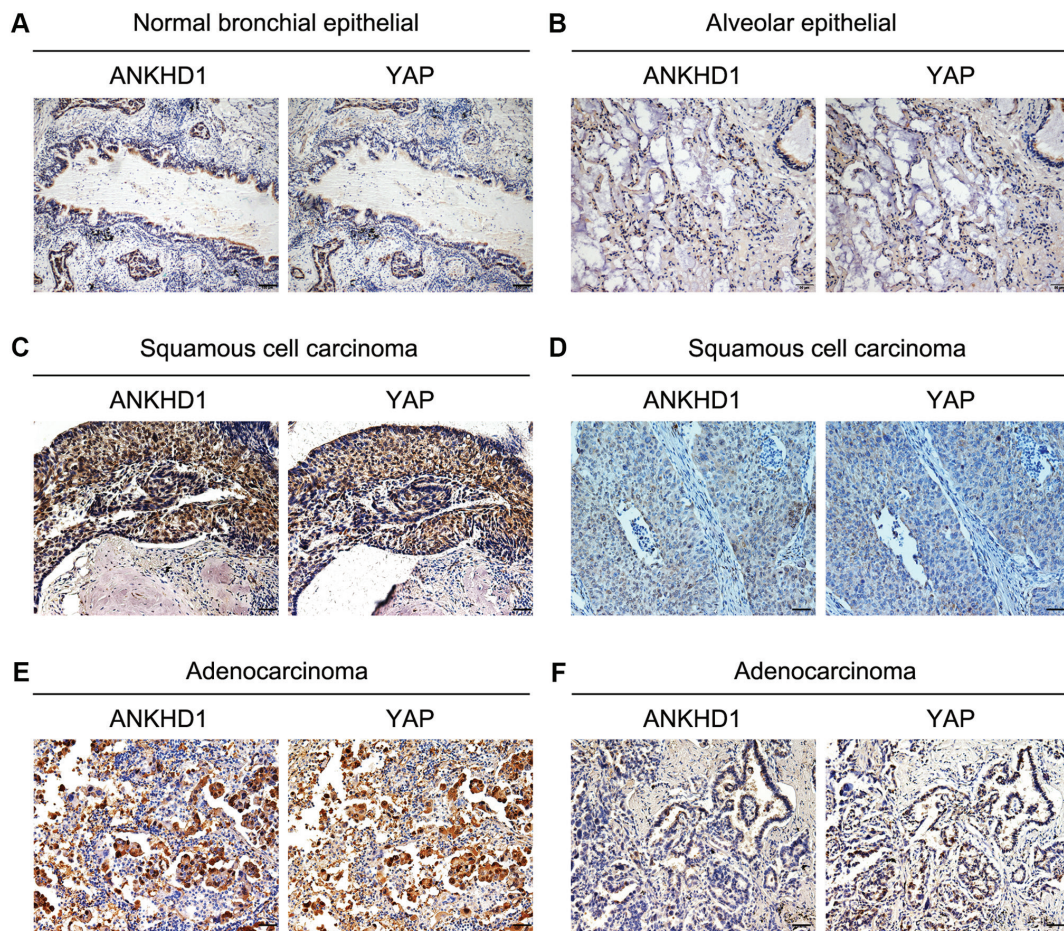

Supplement: Supplementary_Data.pdf [file Supplementary_Data.pdf]
